# Supplementary material for: Effect of diet on molecular relationships between Atlantic cod larval muscle growth dynamics, metabolism, and antioxidant defense system
Source: Frontiers journal article supplement (doi:10.3389/fmars.2022.814022), 2022-08-09
Supplement: Table_1.XLSX [file Table_1.XLSX]

## Sheet: RNAseq
																	Stage 0	Stage 0	Stage 0	Stage 0	Stage 1	Stage 1	Stage 1	Stage 1	Stage 1	Stage 1	Stage 2	Stage 2	Stage 2	Stage 2	Stage 2	Stage 2	Stage 3	Stage 3	Stage 3	Stage 3	Stage 3	Stage 3	Stage 4	Stage 4	Stage 4	Stage 4	Stage 4	Stage 4	Stage 5	Stage 5	Stage 5	Stage 5	Stage 5
ensembl gene ID	description	chromosome	start	end	strand	exons length	sp symb	sp eval	sp score	sp hit	_	u90 symb	u90 eval	u90 score	u90 hit	_	all	all	all	all	Copepod T1	Copepod T2	Copepod T3	Rotifer T1	Rotifer T2	Rotifer T3	Copepod T1	Copepod T2	Copepod T3	Rotifer T1	Rotifer T2	Rotifer T3	Copepod T1	Copepod T2	Copepod T3	Rotifer T1	Rotifer T2	Rotifer T3	Copepod T1	Copepod T2	Copepod T3	Rotifer T1	Rotifer T2	Rotifer T3	Copepod T1	Copepod T2	Copepod T3	Rotifer T1	Rotifer T2
protein_coding	ENSGAUG00000013749	proliferating cell nuclear antigen [Source:HGNC Symbol;Acc:8729]	ATLCOD1Cs2124	186774	188867	-1			777	pcna	3.08102E-147	1340	"gnl|BL_ORD_ID|276615 sp|Q6B6N4|PCNA_HAPBU Proliferating cell nuclear antigen OS=Haplochromis burtoni GN=pcna PE=2 SV=1"		UniRef90_Q9PTP1	4.35774E-146	1884.47	1838.88	1558.33	1611.26	1947.43	2085.35	1997.93	2043.75	1586.73	1722.48	3290.44	2967.7	2375.49	1941.56	1933.14	1705.3	2665.56	2805.25	2731.45	1998.29	2089.07	1481.41	1761.09	1696.01	1416.25	1578.33	1922.14	1514.56	1534.32	1361.27	1394.41	1555.59	1551.87
protein_coding	ENSGAUG00000001549	paired box 7 [Source:HGNC Symbol;Acc:8621]	ATLCOD1Cs2597	275839	331537	-1			1536	pax7	0	2149	"gnl|BL_ORD_ID|275333 sp|P47239|PAX7_MOUSE Paired box protein Pax-7 OS=Mus musculus GN=Pax7 PE=2 SV=2"		UniRef90_C0M005	0	156.151	129.875	87.8448	136.218	125.27	151.192	136.776	121.165	154.63	203.221	167.61	159.639	157.482	157.868	233.55	167.721	235.005	153.258	161.703	230.998	239.84	149.663	98.6639	112.231	110.794	43.2934	42.5206	81.0939	59.3278	46.9876	25.4878	71.2055	29.0291
protein_coding	ENSGAUG00000011389	myogenic differentiation 1 [Source:HGNC Symbol;Acc:7611]	ATLCOD1Cs298	97324	97839	1			490	myod1	3.21231E-073	698	"gnl|BL_ORD_ID|243936 sp|Q91205|MYOD1_ONCMY Myoblast determination protein 1 homolog 1 OS=Oncorhynchus mykiss GN=myod1 PE=2 SV=1"		UniRef90_E2GK06	2.30358E-072	330.996	366.89	281.921	316.778	275.52	291.395	284.786	368.896	302.859	337.615	382.781	332.052	525.004	257.24	346.225	268.575	566.16	490.868	452.736	460.186	320.349	371.371	689.236	608.298	753.61	642.475	732.814	609.91	835.209	692.968	839.636	625.42	577.877
protein_coding	ENSGAUG00000016963	myogenic differentiation 1 [Source:HGNC Symbol;Acc:7611]	ATLCOD1Cs1666	126944	129069	-1			784	myod2	8.17938E-062	604	"gnl|BL_ORD_ID|243941 sp|Q91206|MYOD2_ONCMY Myoblast determination protein 1 homolog 2 OS=Oncorhynchus mykiss GN=myod2 PE=2 SV=1"		UniRef90_Q91206	1.00025E-060	108.505	151.681	124.692	122.333	191.33	164.826	161.749	197.172	181.548	183.487	232.619	243.104	248.892	150.121	172.672	136.082	298.41	344.522	248.5	176.249	165.5	156.911	279.296	251.834	226.064	203.191	258.42	154.514	133.207	104.363	96.8983	183.05	126.935
protein_coding	ENSGAUG00000015431	myocyte enhancer factor 2A [Source:HGNC Symbol;Acc:6993]	ATLCOD1Cs2554	408192	444235	1			1439	mef2a	1.59993E-132	1217	"gnl|BL_ORD_ID|219283 sp|Q03414|MEF2A_XENLA Myocyte-specific enhancer factor 2A homolog OS=Xenopus laevis GN=mef2a PE=1 SV=2"		UniRef90_F1QP82	2.23954E-149	70.9851	52.2318	41.1838	96.8855	191.89	215.329	184.742	215.446	160.636	221.126	258.683	240.813	229	206.644	324.444	181.147	413.603	378.488	261.942	386.869	370.216	248.748	431.997	375.762	451.134	538.409	478.075	562.088	484.875	555.696	391.308	502.878	280.332
protein_coding	ENSGAUG00000016717	caspase 3, apoptosis-related cysteine peptidase [Source:HGNC Symbol;Acc:1504]	ATLCOD1Cs4066	28650	32674	-1			578	casp3	3.02294E-056	553	"gnl|BL_ORD_ID|48351 sp|Q08DY9|CASP3_BOVIN Caspase-3 OS=Bos taurus GN=CASP3 PE=2 SV=1"		UniRef90_Q4ZHV0	1.2279E-060	33.0318	36.0832	33.274	24.9933	31.63	29.621	38.6801	52.5665	39.5221	39.7789	74.3839	68.5474	65.8979	67.6221	83.3253	42.1025	65.9016	60.8077	45.1909	69.8305	74.6655	70.6469	93.1151	76.6018	77.8385	193.411	183.915	224.801	174.389	221.412	245.775	201.36	252.225
protein_coding	ENSGAUG00000001165	insulin-like growth factor 1 (somatomedin C) [Source:HGNC Symbol;Acc:5464]	ATLCOD1Cs3870	197464	211996	1			548	igf1	3.34093E-065	630	"gnl|BL_ORD_ID|179000 sp|P17085|IGF1_ONCKI Insulin-like growth factor I OS=Oncorhynchus kisutch GN=igf1 PE=1 SV=2"		UniRef90_A1X594	8.36136E-068	2.0213	4.1548	3.5673	2.086	4.07	4.219	8.388	7.1485	9.6867	10.1528	11.1594	9.6249	9.2488	17.9168	11.4324	18.8501	24.6281	32.6713	19.2124	13.0398	10.5596	23.5978	20.4279	33.666	29.0599	29.3122	28.0873	33.6213	28.0025	59.5027	38.8386	36.8893	36.1586
protein_coding	ENSGAUG00000015335	insulin-like growth factor 1 receptor [Source:HGNC Symbol;Acc:5465]	ATLCOD1Cs2554	258706	332221	1			3912	igf1-r	0	2281	"gnl|BL_ORD_ID|178984 sp|P08069|IGF1R_HUMAN Insulin-like growth factor 1 receptor OS=Homo sapiens GN=IGF1R PE=1 SV=1"		UniRef90_B7U6F6	0	34.1931	26.4043	15.3589	65.6123	238.23	275.49	234.458	238.434	290.637	254.199	206.887	196.819	300.86	301.189	398.574	265.613	237.654	224.421	160.754	303.069	350.594	273.364	186.813	133.434	157.119	144.761	184.375	240.605	108.514	160.359	146.611	171.45	72.9155
protein_coding	ENSGAUG00000014434	fructose-1,6-bisphosphatase 2 [Source:HGNC Symbol;Acc:3607]	ATLCOD1Cs3001	567003	578339	1			1003	fbp2	2.93341E-154	1402	"gnl|BL_ORD_ID|116846 sp|Q9Z1N1|F16P2_RAT Fructose-1,6-bisphosphatase isozyme 2 OS=Rattus norvegicus GN=Fbp2 PE=2 SV=1"		UniRef90_Q4RTU3	1.03414E-177	248.316	285.158	206.672	223.544	222.2	316.07	240.024	345.615	244.665	257.005	271.032	303.459	343.923	206.065	304.054	195.981	785.987	782.146	786.652	379.416	375.681	341.086	1528.35	1360.6	1480.01	1404.68	1187.56	1383.5	1331.37	1287.35	1321.37	1515.6	1405.39
protein_coding	ENSGAUG00000012687	lactate dehydrogenase A [Source:HGNC Symbol;Acc:6535]	ATLCOD1Cs2194	340	77139	1			991	ldha	1.02121E-161	1466	"gnl|BL_ORD_ID|199283 sp|O13277|LDHA_SPHID L-lactate dehydrogenase A chain OS=Sphyraena idiastes GN=ldha PE=2 SV=3"		UniRef90_O93401	1.45843E-159	727.215	630.999	490.295	596.61	397.4	548.914	619.081	783.855	705.969	704.72	1930.31	1406.15	2172.84	1032.81	1158.6	1095.18	5078.6	5503.11	5051.38	2395.22	1719.19	2140.8	7919.02	6257.92	6019.45	7138.89	5781.49	7206.28	7403.62	8220.78	7797.5	7662.08	8871.87
protein_coding	ENSGAUG00000001043	none	ATLCOD1Cs345	85078	108294	1			1426	slc2a11	9.84915E-099	925	"gnl|BL_ORD_ID|153613 sp|Q9BYW1|GTR11_HUMAN Solute carrier family 2, facilitated glucose transporter member 11 OS=Homo sapiens GN=SLC2A11 PE=2 SV=1"		UniRef90_C3KI70	0	10.929	4.5001	8.1738	9.636	58.98	46.3057	146.293	4.8676	3.6063	8.9559	102.976	65.1624	67.5655	6.4874	18.7301	4.1518	105.171	88.5769	81.0034	50.7564	11.9753	5.0129	53.4837	41.3009	52.351	14.1425	13.391	7.1272	205.702	216.014	166.141	14.3336	191.525
protein_coding	ENSGAUG00000001060	peroxisome proliferator-activated receptor alpha [Source:HGNC Symbol;Acc:9232]	ATLCOD1Cs856	516719	549792	1			1115	ppara	0	1658	"gnl|BL_ORD_ID|291845 sp|Q07869|PPARA_HUMAN Peroxisome proliferator-activated receptor alpha OS=Homo sapiens GN=PPARA PE=1 SV=2"		UniRef90_E2IH97	0	54.5885	36.1813	29.819	66.9701	165.71	194.661	226.778	211.09	223.212	225.721	169.911	198.771	153.825	175.136	257.692	155.527	136.734	107.001	92.4852	188.317	191.533	172.976	131.532	106.501	87.9341	115.695	77.6696	113.309	111.467	111.179	79.8692	96.7801	84.6069
Data are of normalised reads of mRNA transcripts obtained from whole cod larvae
Cod were sampled at siz stages (S0: 4 mm SL; S1: 5mmSL; S2: 7 mmSL; S3: 9-10 mm SL, S4: 13 - 15 mmSL; S5: 24-27 mm SL).
Biological replicates for each of the two treatments (Rotifer or Copepod) were 4 at stage 0 (n=4) and 3 at stages 1 - 5 (n=3)
[truncated: 1 more columns]

## Sheet: RT_qPCR
The mean Ct values of the 10 genes in skeletal muscle of cod larvae fed copepods or rotifers at different stages from 0 - 6 ( ~ 4, 5, 7, 10, 15, 25, and 40 mm SL)
Biological replicates for each of the two treatments (Rotifer or Copepod) were 4 at stage 0 - 5 (n=4) and 3 at stage 6/early juvenile (n=3)
	Stage 0	Stage 0	Stage 0	Stage 0	Stage1	Stage1	Stage1	Stage1	Stage1	Stage1	Stage1	Stage1	Stage 2	Stage 2	Stage 2	Stage 2	Stage 2	Stage 2	Stage 2	Stage 2	Stage 3	Stage 3	Stage 3	Stage 3	Stage 3	Stage 3	Stage 3	Stage 3	Stage 4	Stage 4	Stage 4	Stage 4	Stage 4	Stage 4	Stage 4	Stage 4	Stage 5	Stage 5	Stage 5	Stage 5	Stage 5	Stage 5	Stage 5	Stage 5	Stage 6	Stage 6	Stage 6	Stage 6	Stage 6
	all	all	all	all	Copepod	Copepod	Copepod	Copepod	Rotifer	Rotifer	Rotifer	Rotifer	Copepod	Copepod	Copepod	Copepod	Rotifer	Rotifer	Rotifer	Rotifer	Copepod	Copepod	Copepod	Copepod	Rotifer	Rotifer	Rotifer	Rotifer	Copepod	Copepod	Copepod	Copepod	Rotifer	Rotifer	Rotifer	Rotifer	Copepod	Copepod	Copepod	Copepod	Rotifer	Rotifer	Rotifer	Rotifer	Copepod	Copepod	Copepod	R84A	R84B
pcna	28.25	28.04	29.54	27.93	26.15	26.91	26.74	24.51	25.87	26.89	26.39	26.48	24.63	24.34	24.6	24.43	24.06	24.48	23.41	25.15	23.3	23.49	23.75	23.23	23.88	23.87	24.19	23.95	26.72	27.25	27.15	26.85	27.46	26.61	27.33	28.48	26.36	26.7	25.34	25.99	25.42	25.18	26.2	26.9	29.59	32.83	26.59	26.85	26.47
pax7	28.63	28.76	28.63	28.48	27.97	28.16	27.97	26.8	27.38	26.81	27.76	27.02	27.06	27.9	27.6	27.47	27.95	27.77	26.78	27.93	27.84	28.18	27.64	27.47	27.54	27.43	27.39	26.73	28.43	28.68	28.79	29.05	29.4	30.44	31.4	30.43	29.3	30.4	28.94	30.71	30.13	29.82	31.62	31.34	33.07	35.96	33.01	32.44	31.94
myod1	28.18	28.33	29.46	28.54	28.14	27.68	27.6	28.16	27.56	27.8	26.03	28.17	26.87	27.62	27.68	27.17	26.14	26.75	28.36	26.78	25.87	25.75	25.57	25.19	26.49	26.09	26.33	25.75	26.07	26.16	25.49	25.61	26.38	26.98	27.77	26.88	25.77	26.23	25.67	26.55	26.46	25.9	26.71	27.23	26.87	29.19	25.97	26.89	26.11
myodh1	31.32	32.11	31.25	31.11	29.48	30.36	31.49	28.16	29.1	30.82	29.26	28.68	29.71	28.44	29.77	29.21	31.73	30.98	29.71	30.74	27.88	29.77	29.12	28.17	30.28	29.87	30.81	29.23	29.44	30.19	29.89	30.06	29.15	30.2	30.23	30.48	30.39	30.74	31.35	30.82	30.36	30.07	31.9	31.36	34.76	29.72	31.77	31.69	31.49
sod1	33.05	33.85	34.73	34.08	31.57	32.43	34.76	33.11	32.2	31.91	33.23	32.89	30.87	30.71	31.58	30.97	30.72	30.71	31.12	30.5	28.67	29.44	29.66	28.51	29.08	29.25	29.93	29.54	31.36	30.85	30.62	31.27	29.04	30.17	29.2	30.47	31.26	30.55	30.05	30.49	31.85	31.5	30.99	30.86	29.28	32.57	30.52	31.17	30.18
sod2	28.28	27.76	29.5	29.09	26.94	28.31	26.82	28.12	28.23	28.76	30	28.55	27.46	27.58	27.98	27.81	27.7	27.5	27.75	27.25	25.45	25.48	25.95	25.66	26.83	26.09	26.65	26.46	28.13	28.9	28.91	28.99	28.07	29.68	29.54	29.17	28.62	29.4	27.03	28.73	27.79	27.36	28.85	28.6	28.81	30.83	28.38	28.63	28.09
cat	29.29	29.37	29.31	29.65	29.32	29.86	29.92	28.65	29.03	29.96	28.19	29.61	29.63	29.5	30.09	29.64	28.56	28.87	28.21	28.69	29.64	29.85	30.01	29.3	29.13	29.79	29.85	29.74	30.79	29.35	29.93	30.46	31.79	31.16	32.08	31.82	29.43	30.11	29.65	30.07	29.73	31.02	30.07	30.58	30.37	30.83	29.67	30.77	29.67
gpx1	29.19	29.17	29.91	29.72	26.68	27.21	30.01	28.75	29.74	28.54	28.58	27.72	28.77	30.24	29.89	30.44	26.65	27.8	25.94	27.34	28.07	28.21	27.37	27.35	28.9	28.06	28.03	28.51	31.09	30.94	30.42	29.46	30.63	30.82	29.73	29.52	26.85	26.8	26.83	26.24	25.91	26.45	25.83	25.73	26.4	29.78	24.5	24.09	24.95
nox1	30.43	30.47	31.33	30.7	28.63	29.55	29.41	28.18	29.83	29.85	28.27	29.43	28.6	28.46	27.99	27.44	28.44	28.33	26.94	27.15	30.37	30.14	30.01	30.77	28.53	29.65	28.6	29.98	30.76	29.94	29.8	30.69	32.67	33.09	31.25	32.18	30.63	32.88	31.3	32.5	30.29	31.26	32.03	31.36	35.28	35.97	32.7	32.93	35.08
p38	27.97	28.24	27.89	27.51	27.33	26.17	26.24	26.86	25.9	26.6	27.19	25.63	25.8	26.47	26.5	26.54	26.14	25.18	24.81	25.81	24.93	25.26	25.38	24.07	25.31	25.31	24.94	25.17	26.17	26.37	26.92	26.22	26.81	26.93	26.81	26.24	26.31	26.64	26.18	26.29	26.06	26.33	26.78	26.73	28.35	30.14	27.09	27.31	26.95
[truncated: 1 more columns]
